20

21

\*Correspondence

22

Claudia Massaccesi: [claudia.massaccesi@univie.ac.at](mailto:claudia.massaccesi@univie.ac.at)

23

Giorgia Silani: [giorgia.silani@univie.ac.at](mailto:giorgia.silani@univie.ac.at)

24

25

## 26 **Abstract**

27 Animal research suggests a central role of the  $\mu$ -opioid receptor (MOR) system in mediating  
28 contact seeking and the stress-buffering function of social touch. However, the human  
29 neurochemistry of social motivation in aversive situations is still poorly understood.

30 In a randomized, double-blind, between-subject design, healthy female volunteers (N = 80)  
31 received either 10 mg of the  $\mu$ -opioid agonist morphine sulfate or a placebo. Following  
32 psychosocial stress induction, participants engaged in a social reward task, in which the motivation  
33 (subjective ratings of wanting and physical effort) to obtain skin-to-skin social touch and the  
34 hedonic reactions (subjective ratings of liking and facial electromyography) elicited by it were  
35 assessed.

36 Morphine administration prevented the increase of salivary cortisol, usually observed in response  
37 to acute stress exposure. The dampened physiological reaction to the psychosocial stress was  
38 associated with increased negative mood and subsequent higher subjective wanting of the most  
39 pleasurable touch. Furthermore, participants administered with morphine displayed greater  
40 activity of the corrugator muscle during reward anticipation, possibly tracking enhanced attention  
41 toward the social stimuli.

42 Overall, the results provide novel evidence on the effect of exogenous opioids administration on  
43 the reactions to psychosocial stress and point to a state-dependent regulation of social motivation.

## 44 **Introduction**

45 Social behaviors such as bonding and affiliation are crucial for the survival and wellbeing of many  
46 species. By providing fundamental benefits (e.g., promoting safety and enhancing stress resilience)  
47 and by generating comfort and pleasure, social stimuli (e.g., social contact) gain rewarding value,  
48 inducing approach motivation. Inability to form and maintain social bonds contributes to a range  
49 of psychiatric and physical pathologies (e.g., Cacioppo & Cacioppo, 2014; Uchino, 2006),  
50 therefore highlighting the importance to better understand the neurobiological basis of social  
51 motivation.

52 The Brain Opioid Theory of Social Attachment (BOTSA), originally inspired by the analogies  
53 between opioid addiction and social dependence, pinpoint the  $\mu$ -opioid receptor (MOR) system as  
54 a key mediator of bonding and affiliation (Panksepp, 1998; Panksepp et al., 1980). Specifically,  
55 BOTSA predicts that social isolation results in reduced levels of basal opioid levels, which in turn  
56 motivate social contact seeking, and that rewarding social interactions elicit release of endogenous  
57 opioids, associated with euphoria and contentment. The two-fold role of the endogenous opioid  
58 system in reward and pain (Leknes & Tracey, 2008) therefore seems to apply also to experiences  
59 of social nature. In contexts of comfort, the activity of the MOR system during social contact  
60 mediates the rewarding properties, and associated pleasure, of social stimuli, positively reinforcing  
61 exploration and affiliation. In contexts of distress, the release of endogenous opioids via social  
62 contact reduces pain and negative affect, negatively reinforcing social behaviors (Loseth et al.,  
63 2014).

64 In line with this model, animal studies have shown that  $\mu$ -opioids are released following physical  
65 social contact, such as grooming and playing (Keverne et al., 1989; Panksepp & Bishop, 1981;  
66 Vanderschuren et al., 1995). Pharmacological studies on separation-distress in animals further

67 confirmed BOTSA predictions, showing that administration of MOR agonists reduces, and of  
68 MOR antagonists increases distress responses and motivation for social contact, such as grooming  
69 (Keverne et al., 1989; Martel et al., 1995; Panksepp et al., 1980; Fabre-Nys et al., 1982; Meller et  
70 al., 1980; for a review see Machin & Dunbar, 2011; see Loseth et al., 2014 for a model accounting  
71 for divergent findings in different species).

72 In the last decade, preliminary confirmatory evidence on the  $\mu$ -opioid mediation of the rewarding  
73 properties of social stimuli in humans have been provided. These studies mainly focused on two  
74 fundamental components: wanting, namely the motivational drive to obtain the social stimulus,  
75 and liking, namely the pleasure elicited once it is received. Results showed that pharmacological  
76 challenge of the MOR system affects wanting and/or liking of different kind of social stimuli, such  
77 as erotic pictures (Buchel et al., 2018), attractive faces (Chelnokova et al., 2014), and social touch  
78 (Korb, Götzendorfer, et al., 2020; but see also Løseth et al., 2019). MOR activation has been also  
79 associated with social laughter (Manninen et al., 2017), and MOR blockade was shown to reduce  
80 feelings of social connection (Inagaki et al., 2015, 2016, 2020), as well as of interpersonal  
81 closeness and social reward expectation (Tchalova & MacDonald, 2020). Using PET, Hsu et al.  
82 (2013) observed MOR activation in response to both social rejection and social acceptance. In the  
83 first case, MOR activity was correlated with reduced negative affect, while in the latter it was  
84 associated with increased desire for social interaction. These findings are consistent with a  
85 “protective” and an “affiliative” role of the MOR system during social distress and social comfort,  
86 respectively. Regarding the role of the MOR system in stress regulation, a recent study showed  
87 that MOR agonist administration reduces individuals’ physiological stress response (as measured  
88 by cortisol), as well as the perceived difficulty of the stress task (Bershad et al., 2018). However,

89 direct evidence of an involvement of the MOR system in downregulating stress and how this  
90 affects social contact seeking, as shown in non-human animal species, is still lacking.

91 Here, we aimed at filling this knowledge gap by investigating the effect of MOR agonist  
92 administration (morphine) on social motivation and social pleasure following stress exposure.  
93 Using a double-blind, placebo-controlled, randomized, between-subjects design, female  
94 participants (N = 80) were orally administered with either 10 mg morphine sulfate (a highly  
95 selective  $\mu$ -opioid agonist) or placebo. Following a psychosocial stress induction procedure, the  
96 motivation to obtain social touch (wanting) and the pleasure elicited by receiving it (liking) were  
97 assessed (see Figure 1 for a detailed description). In order to enhance the translational value of the  
98 study, the following steps were taken: i) as in previous animal research, which entailed social  
99 separation, a stressor of social nature (via the Trier Social Stress Test, Kirschbaum et al., 1993)  
100 was employed; ii) in addition to self-reports of wanting and liking, we assessed real physical effort  
101 (via a hand-dynamometer) and hedonic facial reactions (via facial electromyography of corrugator  
102 and zygomaticus muscles), approximating the motivational and hedonic (i.e., wanting and liking)  
103 measures used in animal studies; iii) to parallel grooming in animals, skin-to-skin touch  
104 administered at different speeds (6, 21, 27 cm/s, corresponding to high, low, and very low reward  
105 levels) was employed as a social reward.

106 Based on the existing human and animal literature, we hypothesized that participants administered  
107 with morphine, compared to placebo, would show reduced physiological and subjective responses  
108 to stress, and that this would result in decreased social motivation. As previous studies had shown  
109 an effect of stress on wanting rather than on liking of touch (Massaccesi et al., 2021) or food (e.g.  
110 Pool et al., 2015) reward, we did not expect changes in the hedonic reactions to social contact.  
111 Given that MOR manipulations have been shown to induce the strongest effects on the best reward

112 option available (Chelnokova et al., 2014; Eikemo et al., 2016), and considering the stress  
 113 buffering function of C tactile (CT)-optimal touch (i.e., touch with stroking speed of 1 to 10 cm/s;  
 114 Morrison, 2016), we expected the predicted effects to be stronger for the most valuable social  
 115 reward (touch at 6 cm/s).

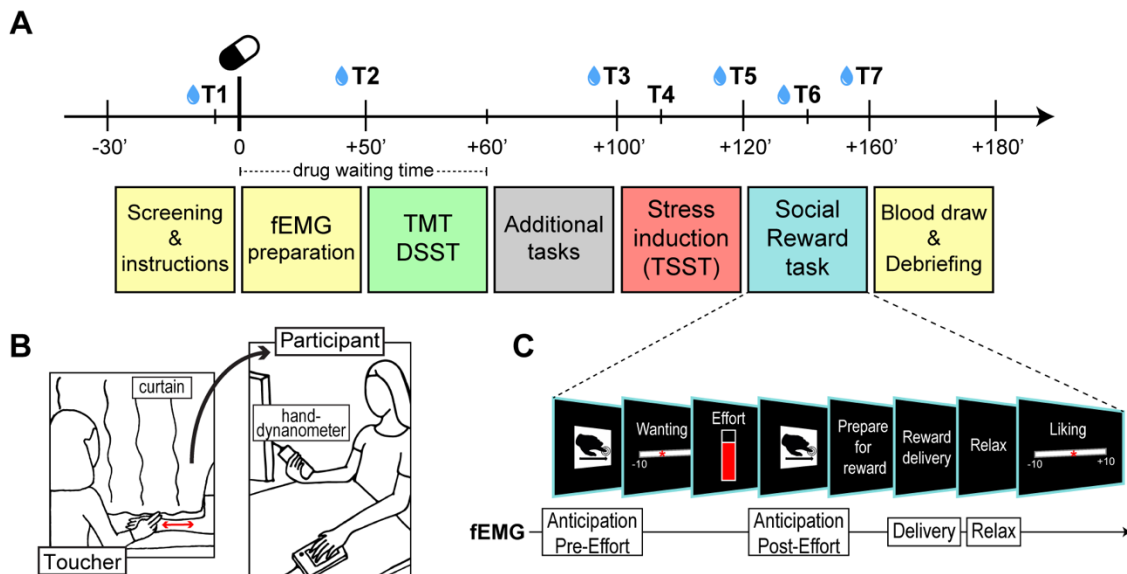

116

117 **Figure 1. Overview of the experimental session, set-up, and trial structure of the Social**  
 118 **Reward task.** (A) Overview of the experimental session. T1 – T7 represent the time points at  
 119 which subjective and/or physiological measures were obtained. Blue drops indicate saliva sample  
 120 collection. (B) Set-up of the Social Reward task (based on Korb, Götzenborfer, et al., 2020;  
 121 Massaccesi et al., 2021). Participants were seated in front of the monitor, holding the hand-  
 122 dynamometer in the right hand. The left arm was rested on a cushion, next to a keyboard used to  
 123 express judgements during the task. The toucher was seated on the other side of a curtain used to  
 124 limit the participants' field of view to the monitor. Touch was administered on the participants'  
 125 left forearm using the index and middle finger, at 3 stroking speeds corresponding to 3 levels of  
 126 reward (high = 6 cm/s, low = 21 cm/s, very low = 27 cm/s). (C) Trial structure of the Social Reward  
 127 task: i) announcement of the best attainable social reward (high or low); ii) rating of subjective  
 128 wanting; iii) effort task requiring to squeeze a hand-dynamometer to obtain the announced reward.  
 129 Participants' force exerted was indicated in real-time by a vertical bar filling in red. The top of the  
 130 displayed vertical bar corresponded to their previously measured maximum voluntary contraction  
 131 (MVC); iv) announcement of the reward attained (high, low, or – if insufficient effort had been  
 132 exerted – very low); v) skin-to-skin touch administration; vi) relax phase; vii) rating of subjective  
 133 liking. Facial electromyography (fEMG) was recorded during the whole task and analyzed in  
 134 reward anticipation (Anticipation Pre-Effort and Post-Effort) and consumption (Delivery and  
 135 Relax). TMT, Trail Making Test; DSST, Digit Symbol Substitution Test; TSST, Trier Social Stress  
 136 Test.

## 137 **Results**

### 138 **Drug blinding**

139 After completing the session, 50% of the participants correctly guessed they received morphine,  
140 indicating successful blinding. Overall, 55% of the total sample believed to have been administered  
141 with placebo, 29% with morphine, and 16% with naltrexone<sup>1</sup>.

### 142 **Effects of morphine on cognitive functions and drug side-effects**

143 There were no significant differences in the Digit Symbol Substitution Test (DSST) and Trail  
144 Making Test (TMT) scores across groups, indicating that drug administration did not have negative  
145 effects on attention, psychomotor and processing speed, and visuo-perceptual functions (See Table  
146 S1 in *Supplementary Material*). Morphine administration significantly increased self-reported  
147 weakness (MORPH vs. PLB at T2:  $t(69.9) = 2.64, p = 0.01$ , and at T7:  $t(55.96) = 2.19, p = 0.03$ )  
148 and dry mouth (MORPH vs. PLB at T7:  $t(57.70) = 2.56, p = 0.01$ ). For all side-effect measures,  
149 group average scores were generally low, and no side-effect was on average rated as moderate or  
150 strong (see Figure S2 in *Supplementary Material*).

### 151 **Effects of morphine on stress response**

#### 152 ***Subjective measures***

153 Morphine administration resulted in significantly higher scores of the Profile of Mood States  
154 (POMS) subscale “Displeasure” after stress induction (Drug\*Time:  $F(4,312) = 2.97$ , FDR  $p =$   
155  $0.03$ ; MORPH vs. PLB at T5: FDR  $p < 0.01$ ) (Figure 2A). A similar pattern, though not reaching  
156 statistical significance, was observed for negative mood (Drug\*Time:  $F(6,468) = 2.16$ , FDR  $p =$   
157  $0.068$ ) (Figure 2A). No significant group differences were observed for positive mood or for the

---

<sup>1</sup> To reduce drug-related expectancy, participants were told they might receive an opioid agonist (morphine), antagonist (naltrexone) or placebo (but they could receive only morphine or placebo).



158 POMS subscales “Depression”, “Vigor”, and “Fatigue” (all FDR  $p > .15$ ). Furthermore, no drug  
159 effects were observed in anticipatory stress (PASA primary and secondary appraisal at T4; both  $t$   
160  $< 0.60$ ,  $p > 0.55$ ), nor in the participants’ satisfaction towards their performance expressed after  
161 TSST completion (T5;  $t(75.2) = -0.63$ ,  $p = 0.53$ ).

## 162 ***Physiological measures***

163 As physiological stress biomarkers, salivary cortisol (hypothalamic–pituitary–adrenal [HPA] axis  
164 activity), salivary alpha-amylase and heart rate (autonomic nervous system [ANS] activity) had  
165 been assessed at different time-points during the session (see Figure 1).

166 Morphine administration suppressed cortisol response to the TSST (Drug\*Time:  $F(5,375) = 7.68$ ,  
167 FDR  $p < 0.001$ , Figure 2B). Specifically, the morphine group showed reduced salivary cortisol  
168 compared to the placebo group at T2 (FDR  $p = 0.079$ ), T3 (FDR  $p < 0.01$ ), T5 (FDR  $p < 0.001$ ),  
169 T6 (FDR  $p < 0.001$ ) and T7 (FDR  $p < 0.001$ ) (Figure 2A). No drug effects were observed in  
170 salivary alpha-amylase (all  $F < 0.38$ , all FDR  $p > 0.62$ ) or in heart rate (all  $F < 2.83$ , all FDR  $p >$   
171  $0.09$ ) (Figure 2B).

### A. Subjective response to stress

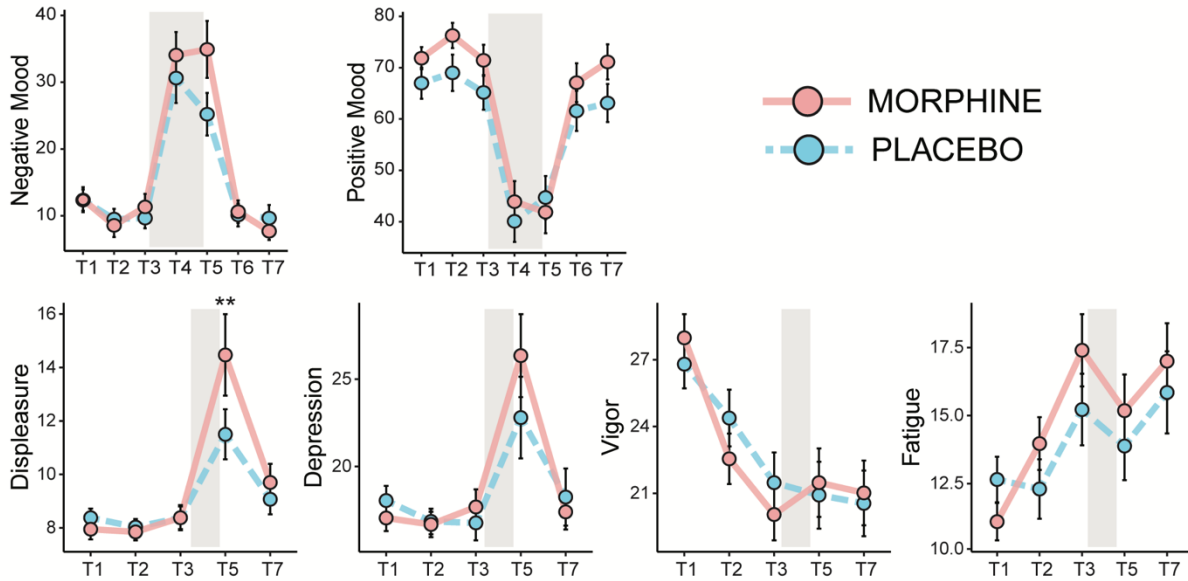

### B. Physiological response to stress

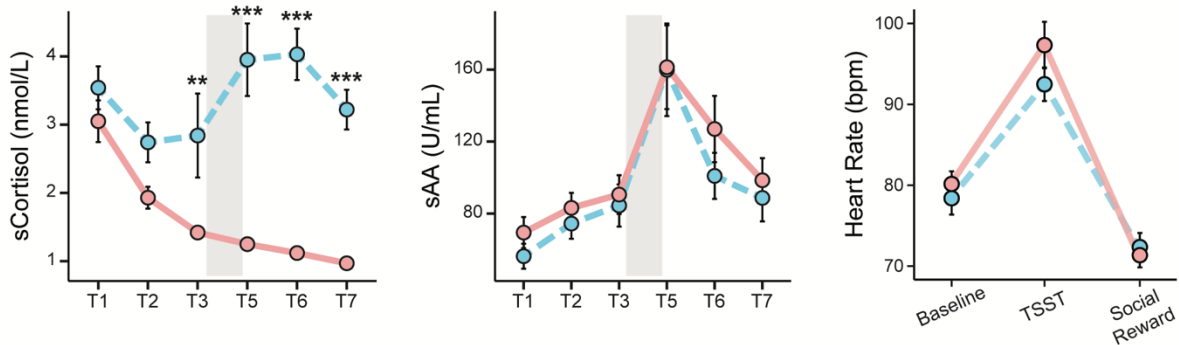

172

173 **Figure 2. Effects of morphine administration on subjective and physiological stress**  
 174 **responses.** (A) Morphine administration increased the subjective negative response to stress, as  
 175 shown by elevated negative mood (measured via visual analog scales) and higher scores at the  
 176 “Displeasure” subscale (POMS) immediately after the Trier Social Stress Test (TSST). No  
 177 significant drug effects were observed in positive mood or in any other POMS subscales  
 178 (depression, vigor, fatigue). (B) Morphine administration suppressed the hypothalamic–pituitary–  
 179 adrenal (HPA) axis activity, as shown by blunted salivary cortisol before and after stress induction.  
 180 No significant drug effects were observed in the autonomic nervous system (ANS) response to  
 181 stress, assessed via salivary alpha-amylase (sAA) and heart rate. Grey bars represent the TSST  
 182 time window (anticipation, speech, and arithmetic task); error bars represent standard error of the  
 183 mean; asterisks indicate significant differences between drug groups (\*  $p < .05$ , \*\*\*  $p < .001$ ).

184 ***Correlations between physiological and subjective measures of stress***

185 Given the observed opposite effect of the drug on cortisol and mood, we conducted a correlation  
186 analysis to investigate the association between physiological and subjective measures of stress. To  
187 this aim, we first computed the area under the curve in respect to increase ((AUC<sub>i</sub>, from T3 to T7;  
188 Pruessner et al., 2003) of the cortisol levels and of the negative mood ratings (VAS and POMS).  
189 Results showed a negative correlation between salivary cortisol and negative mood (VAS;  $r_s = -$   
190  $.36$ ,  $p_{\text{bonferroni}} = .048$ ) as well as between cortisol and the Displeasure subscale of POMS ( $r_s =$   
191  $-.37$ ,  $p_{\text{bonferroni}} = .044$ ), suggesting an inverse relationship between HPA axis and mood  
192 responses to stress.

193 **Effects of morphine on social reward processing**

194 Using a recently developed Social Reward task (Korb, Götzendorfer, et al., 2020; Massaccesi et  
195 al., 2021), we assessed subjective wanting and liking of social reward in different levels.  
196 Participants were announced with either high (6 cm/s, CT-optimal touch<sup>2</sup>) or low (21 cm/s, non-  
197 CT-optimal touch) social reward and rated their wanting of the stimulus. Based on an effort task,  
198 they could then receive the announced or the very low (27 cm/s, non-CT-optimal touch) social  
199 reward and had to rate their liking of the received stimulus.

200 We first assessed whether the number of high, low and very low rewards obtained during the task  
201 was similar for the two groups. A linear model on number of trials was fitted, including Drug  
202 (MORPH, PLB) and Reward Level (high, low, and very low). We observed only a main effect of  
203 Reward Level ( $F(2,369.5) = 11.28$ ,  $p < 0.001$ ), indicating that participants obtained more often  
204 high rewards as compared to low and very low rewards. We also tested for group differences in

---

<sup>2</sup> Touch administered at a velocity falling into the range of 1 to 10 cm/s activates CT afferents, a special class of nerve fibers found in human hairy skin involved in signaling the affective aspects of social touch (Morrison et al., 2010), and was shown to elicit greater pleasure, compared to touch administered at faster velocities.

205 the average maximum voluntary contraction (MVC), assessed before and after the Social Reward  
206 task and used to calibrate the effort task. No significant differences emerged (all  $t < -0.84$ , all  
207  $p > 0.40$ ), indicating no drug effects on participants' grip force at rest. Last, we tested for group  
208 differences in the baseline activity of the corrugator and zygomaticus muscles. No significant  
209 differences emerged (all  $t < 1.27$ , all  $p > 0.21$ ).

### 210 *Effects of morphine on subjective ratings of wanting and liking*

211 To investigate the effects of morphine administration on subjective wanting and liking of social  
212 touch under stress, we fitted two linear mixed-effects models (LMM) on the ratings of wanting  
213 and liking, including Drug (MORPH, PLB) and Reward Level (high, low for wanting ratings, and  
214 high, low, very low for liking ratings) as fixed effects, and by-subject random intercepts and slopes  
215 for Reward Level.

216 *Ratings of Wanting.* Participants administered morphine expressed significantly greater wanting  
217 of the high social reward (CT-optimal touch) compared to the placebo group (Drug\*Reward Level:  
218  $F(1,78) = 10.56$ , FDR  $p = 0.003$ ; high social reward MORPH vs. PLB: FDR  $p = 0.035$ ) (Figure  
219 3A). No drug effects emerged for the low social reward (FDR  $p = 0.72$ ).

220 *Ratings of Liking.* Participants in both groups expressed greater liking for high compared to low  
221 social rewards, which in turn were more liked than the very low social rewards (Reward Level:  
222  $F(2,72.9) = 20.93$ , FDR  $p < 0.001$ ; high vs. low vs. very low: all FDR  $p < 0.001$ ). Further,  
223 participants administered morphine generally liked the interpersonal touch (across all reward  
224 levels) more compared to the placebo group, but the effect did not reach significance (Drug:  
225  $F(1,78) = 4.23$ , FDR  $p = 0.065$ ) (Figure 3B).

226 ***Effects of morphine on force exerted and hedonic facial reactions***

227 We further assessed wanting of social rewards in terms of force exerted to obtain the tactile stimuli,  
228 as well as hedonic facial reactions during reward anticipation (Anticipation Pre- and Post-Effort  
229 phases). Hedonic facial reactions during and after consumption (Delivery and Relax phases) of the  
230 social reward were employed as a measure of liking. Hedonic facial reactions were assessed via  
231 facial electromyography (fEMG) of the corrugator (frowning) and zygomaticus (smiling) muscles.

232 *Force exerted.* Participants overall exerted greater force to obtain the high compared to the low  
233 social reward (Reward Level:  $F(1,78) = 14.23$ , FDR  $p < 0.001$ ). We also observed greater  
234 difference in terms of force exerted for the high compared to the low reward in the morphine than  
235 in the placebo group, but the effect did not reach significance (Drug\*Reward Level interaction:  
236  $F(1,78) = 4.13$ , FDR  $p = 0.068$ ) (Figure 3C).

237 *Corrugator (frowning).* During the announcement of the highest attainable social reward  
238 (Anticipation Pre-Effort), we observed greater corrugator activity following morphine  
239 administration, compared to placebo (Drug:  $F(1,791.3) = 6.15$ , FDR  $p = 0.036$ ) (Figure 3D).  
240 Opposite to previous evidence (e.g., Korb, Götzenborfer, et al., 2020; Korb, Massaccesi, et al.,  
241 2020; Ree et al., 2020), in this phase greater frowning was associated with greater subjective  
242 wanting in both groups (Wanting:  $F(1,1203) = 7.94$ , FDR  $p = 0.036$ ) (Figure 3D). No significant  
243 effects were observed in other phases of the task.

244 *Zygomaticus (smiling).* During the announcement of the obtained social reward (Anticipation Post-  
245 Effort), activity of the zygomaticus was positively associated with subjective wanting of the social  
246 reward (Wanting:  $F(1,73.2) = 10.31$ , FDR  $p < 0.01$ ) (Figure 3E). No significant effects of drug  
247 were observed in the activity of this muscle.

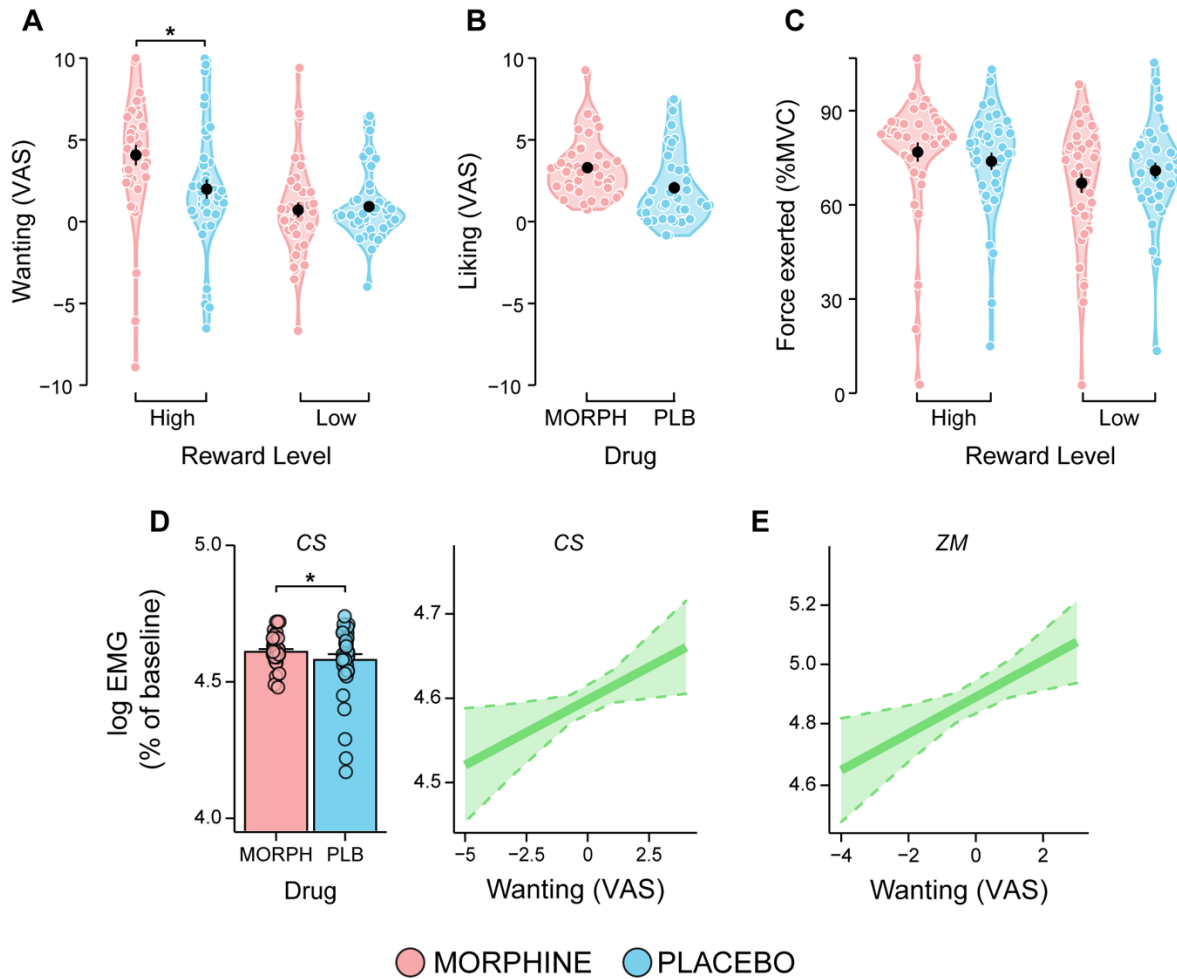

248

249 **Figure 3. Effects of morphine administration on social reward processing after stress**  
 250 **exposure.** Morphine administration resulted in (A) significantly greater wanting for the high social  
 251 reward (6 cm/s, CT-optimal touch), (B) greater liking of the social stimuli regardless of reward  
 252 level (marginally significant drug main effect), and (C) greater differentiation of the high and low  
 253 reward levels in terms of effort exerted (marginally significant drug by reward level interaction  
 254 effect), compared to placebo. Regarding facial hedonic reactions, (D) during the announcement of  
 255 the highest attainable reward (Anticipation Pre-Effort), the morphine group showed greater  
 256 corrugator (CS) activity, which was generally positively associated with subjective wanting. (E)  
 257 During the announcement of the gained reward (Anticipation Post-Effort), greater zygomaticus  
 258 (ZM) activity was associated with greater subjective wanting, but no significant drug effects were  
 259 observed for this muscle. Error bars represent standard error of the mean; black dots represent  
 260 group means; colored dots represent individual means; asterisks indicate significant differences  
 261 between conditions (\*  $p < .05$ ). VAS, Visual Analogue Scale; MORPH, morphine group; PLB,  
 262 placebo group.

## 263 **Discussion**

264 Social motivation is a powerful force guiding behavior, as social rewards (e.g., social contact,  
265 bonding, affiliation) are fundamental to the individual's physical and psychological well-being.  
266 Despite the important role of social contact in stress resilience, the neurochemical mechanisms  
267 underlying social contact seeking following stress exposure in humans are still poorly understood.  
268 In this study, we pharmacologically challenged the  $\mu$ -opioid receptor (MOR) system to investigate  
269 its role in the regulation of the motivational and hedonic components of social reward processing  
270 following stress induction. To parallel previous animal research, participants were exposed to a  
271 stressor of social nature and interpersonal touch was used as a social reward. Further, force exerted  
272 to obtain the reward as well as hedonic facial reactions during its anticipation and consumption  
273 were assessed, together with subjective ratings of wanting and liking. Following the enhancement  
274 of the MOR system activity via administration of its agonist morphine, we observed suppression  
275 of the HPA axis activity (as indicated by a reduced cortisol response) and increased negative affect  
276 in response to psychosocial stress. Notably, this increased negative response to stress following  
277 morphine administration was associated with enhanced motivation for the most pleasurable social  
278 reward.

### 279 *$\mu$ -opioid agonist morphine dampens cortisol and increases negative affect in response to stress*

280 In this study, single administration of the  $\mu$ -opioid agonist morphine prior to TSST exposure  
281 resulted in blunted salivary cortisol response, indicating suppression of the HPA axis reactivity to  
282 stress. This is in line with previous animal and human evidence indicating an inhibitory role of  $\mu$ -  
283 opioids on cortisol release following stress exposure (Pechnick, 1993). Recently, two studies  
284 investigated the effects of partial (buprenorphine) and full (hydromorphone) MOR agonists on  
285 psychosocial stress, induced via TSST (Bershad et al., 2016, 2018). Akin to the present findings,

286 reduced cortisol responses to stress were observed. Buprenorphine and hydromorphone also  
287 reduced the perceived threat and the appraisal of how challenging the participants found the stress  
288 task, respectively. While the authors interpret the findings on cortisol and stress appraisal as  
289 indicators of a reduced stress response, no mood-buffering effects of the drug were observed. This  
290 is in contrast with the current study, where we find that the dampened cortisol response is  
291 accompanied by an enhanced aversive reaction to stress, as shown by higher negative affect  
292 following morphine compared to placebo administration. Human cortisol permeates the blood-  
293 brain barrier to feedback the central nervous system, reducing HPA axis activity and promoting  
294 emotion regulation (Het et al., 2012; McEwen, 1998). The observed inverse relationship between  
295 the HPA axis activity and negative affect possibly indicates a disruption of this feedback loop by  
296 morphine administration and is in line with a mood-buffering effect of cortisol (Het et al., 2012;  
297 Het & Wolf, 2007). Accordingly, it was recently shown that pharmacological HPA axis  
298 suppression, by means of dexamethasone administration, blunts the cortisol response to stress and  
299 increases negative mood, especially in women (Ali et al., 2017, 2020).

300 Our results are opposite to our *a priori* hypothesis based on previous evidence from animal studies  
301 on separation distress indicating a reduction of stress indices, such as distress vocalizations,  
302 following MOR agonist administration (Panksepp et al., 1980). The paradoxical morphine effect  
303 of enhanced aversive stress reaction observed in the current study vs. the previous animal literature  
304 may be explained by experimental differences, such as route and timing of administration of the  
305 opioid compounds. For instance, in animal research morphine is typically delivered intravenously  
306 after stress induction, possibly allowing the system to prepare to face the stressor via an initial  
307 mounting of the physiological stress response. In this study, morphine was administered orally to  
308 minimize the invasiveness of the administration procedure. Unlike intravenous administration,



309 per-oral morphine has a slow pharmacokinetic profile and requires an average time of 60 min to  
310 reach the peak blood concentration. As the subjective response to acute stress, especially its effect  
311 on mood, typically lasts only for short periods of time after laboratory stress induction, orally  
312 administering the drug and waiting for it to reach peak concentration after the TSST would not  
313 have been feasible. For these reasons here the compound was administered prior to stress exposure.  
314 However, the resulting suppression of the HPA axis activity before the beginning of the stress  
315 induction may have led to the observed difference in the mood response. Accordingly, the raising  
316 of cortisol levels, via cortisol administration, prior to stress induction has been shown to have a  
317 protective role in women, lowering the negative subjective reaction to stress (Het & Wolf, 2007).

318 *Morphine-induced increased negative reaction to stress is associated with enhanced social*  
319 *motivation*

320 BOTSA posits that when facing stressors, individuals seek physical social contact with others in  
321 order to down-regulate the negative state and re-store comfort, via endogenous release of beta-  
322 endorphins, unless opioids are externally provided. Contrary to our initial hypotheses, morphine  
323 increased, rather than reduced, participants' negative reactions to the TSST, and such increased  
324 stress responses were accompanied by enhanced social motivation. Specifically, we observed  
325 greater subjective wanting of the most pleasurable social reward (CT-optimal touch) following  
326 morphine administration, compared to placebo. This enhanced subjective wanting was also  
327 accompanied by greater differentiation of the high and low social rewards (CT-optimal and non-  
328 CT-optimal touch) in terms of effort exerted to obtain them in the morphine group compared to  
329 placebo, but the effect did not reach statistical significance.

330 This pattern of results is consistent with previous findings from our group indicating that, as  
331 already shown for other kinds of reward like food and money (e.g. Kumar et al., 2014; Lewis et  
332 al., 2014; Pool et al., 2015), stress increases wanting of rewards of social nature, such as

333 interpersonal touch (Massaccesi et al., 2021). Differently from the present findings, in Massaccesi  
334 et al. (2021) the effect of enhanced wanting for the social reward was independent from reward  
335 magnitude. In other words, participants under stress expressed higher wanting ratings for all types  
336 of social touch compared to non-stressed individuals, regardless of reward magnitude. Here we  
337 observed an effect of morphine and stress on the most pleasurable touch only (high reward level),  
338 characterized by slow stroking velocity (CT-optimal touch).

339 This potentiation of wanting for the most pleasurable touch may be due to a specific influence of  
340 the enhanced MOR system activity. Indeed, previous research has shown that pharmacological  
341 challenges of the MOR system have strongest effects on rewards of greatest magnitude (e.g.,  
342 Chelnokova et al., 2014; Eikemo et al., 2016). Therefore, it can be hypothesized that while stress  
343 alone may result in increased motivation for all available rewarding stimuli, an additional  
344 potentiation of motivation for the most valuable stimulus is seen for the best reward due to MOR  
345 stimulation. This would align well with the observation that participants administered with  
346 morphine also exerted more effort in order to obtain the high reward, as compared to the low  
347 reward, and that this difference in force exerted was greater than in the placebo group (but with  
348 FDR  $p = 0.068$  did not reach the statistical significance). Alternatively, a reason for the partially  
349 different result pattern might be that, differently from the current study, in Massaccesi et al. (2021)  
350 participants were allowed to individually rank the three types of touch as high, low and very low.  
351 The high reward was therefore not necessarily the CT-optimal touch. This could have masked a  
352 possible impact of the type of touch. While Massaccesi et al. 2021 included different state  
353 manipulations, this study focused on the effects of stress. Since slow CT-optimal touch is more  
354 likely to convey affiliative intentions such as social support compared to faster touch (Kirsch et

355 al., 2017), here the slow CT-optimal touch was kept as fixed high reward to avoid possible  
356 confounding effects related to the speed of stroking.

357 During reward anticipation (announcement of the best attainable reward), the increased subjective  
358 wanting of social touch in the morphine group was accompanied by greater activity of the  
359 corrugator muscle. Previous research indicates that individuals relax the corrugator during  
360 anticipation and consumption of rewarding stimuli, showing an inverse relationship between  
361 corrugator activity and reward wanting/liking (Korb, Götzendorfer, et al., 2020; Korb, Massaccesi,  
362 et al., 2020; Massaccesi et al., 2021; Mayo et al., 2018; Ree et al., 2020; Sato et al., 2020). Here,  
363 in contrast, we observed greater frowning for most wanted stimuli. Activity of the corrugator is  
364 commonly associated with emotional processing, but it has been shown to be related also to  
365 processes without emotional content, such as mental and physical effort, alertness, perceptual  
366 attention, task engagement and difficulty (Cacioppo et al., 1985; Cohen et al., 1992; de Morree &  
367 Marcora, 2010; Van Boxtel & Jessurun, 1993; Waterink & van Boxtel, 1994). As individuals are  
368 more attentive to highly rewarding stimuli (e.g. Hickey et al., 2010; Hickey & van Zoest, 2012;  
369 Theeuwes & Belopolsky, 2012) and, since morphine - at a similar dose - has already been shown  
370 to enhance attentional processes such as set-shifting (Quednow et al., 2008), it is possible that the  
371 observed pattern in the corrugator activity reflects enhanced attention/preparation towards the most  
372 wanted stimuli. Together with the higher subjective of wanting, the greater saliency of the  
373 anticipated social rewards, reflected in greater frowning, suggests an enhancement of social  
374 motivation following stress exposure in the morphine group, compared to placebo.

375 Based on previous evidence, we predicted that the effects of morphine administration on social  
376 touch processing under stress would be specific for the motivational component, without affecting  
377 the hedonic aspect. Accordingly, we did not observe a significant effect of drug on the ratings of

378 liking or in the facial hedonic reactions during the reward consumption phase. However, we  
379 nevertheless observed that the ratings of liking were generally higher in the morphine group  
380 compared to the placebo group (FDR  $p = 0.065$ ), and we therefore refrain to exclude an effect of  
381 the manipulation on social pleasure.

### 382 *Study limitations*

383 Some limitations of the study should be considered. First, while the use of a within-subject design  
384 is usually preferable in pharmacology, in this study we employed a between-subjects design. The  
385 choice was mainly motivated by the fact that repeated exposure to the TSST, especially with a  
386 short time interval, can lead to habituation of the stress response, resulting in low test re-test  
387 reliability (e.g., Gerra et al., 2001; Petrowski et al., 2012) and thus outweighing by far the possibly  
388 higher statistical power a within-subject design might have had in principle. Second, despite our  
389 efforts in enhancing the social properties of the administered touch (e.g., skin-to-skin  
390 administration), the absence of a social relationship between the toucher and the participant, as  
391 well as other methodological aspects (e.g., use of a curtain separating participant and toucher),  
392 might have affected our results. Nevertheless, in humans an involvement of the MOR system in  
393 bond formation, rather than just maintenance, has also been observed (Tchalova & MacDonald,  
394 2020). Third, the current study tested a sample of healthy female participants, therefore a  
395 generalization to male individuals is not possible, especially given the known sex differences in  
396 stress reactivity and MOR system functioning. Finally, it is unlikely that a complex behavior such  
397 as social motivation can be fully explained by the activity of a single neurochemical system only.  
398 For instance, the neuropeptides oxytocin and vasopressin are well-known for their crucial role in  
399 bonding and reproductive functions (Donaldson & Young, 2008). Stress exposure induces a potent  
400 activation of the dopaminergic system (Bloomfield et al., 2019; Holly & Miczek, 2016), and it has

401 been shown that MOR stimulation disinhibits dopaminergic neurons in the ventral tegmental area  
402 and increases dopamine release in the nucleus accumbens (Pan, 1998). To investigate how these  
403 systems interact in driving social contact seeking during aversive states seems therefore necessary  
404 to understand the neurobiology of social motivation.

#### 405 *Conclusions*

406 To conclude, our findings show that enhancing  $\mu$ -opioid signaling before psychosocial stress  
407 exposure increases, rather than reduces, the aversive reaction to stress, leading to an increased  
408 subjective motivation for the attainment of highly rewarding social contact. Specifically, we  
409 showed that morphine administration blunted cortisol reactivity to stress and increased the  
410 negativity of the adverse experience, in line with a mood-buffering effect of cortisol. Further, the  
411 results indicate that this enhanced morphine-induced stress response was followed by increased  
412 motivation to attain social rewards, both in terms of subjective wanting as well as of facial  
413 reactions during reward anticipation.

414 Overall, the results provide novel evidence on the modulation of the physiological and subjective  
415 responses to social stress by the MOR system and indicate a state-dependent regulation of social  
416 motivation. To better understand the role of  $\mu$ -opioids in the potentiation of social motivation  
417 during aversive states, further investigation of the effects of MOR agonists and antagonists  
418 administered after stress induction, as well as of the interaction with other neurochemical systems,  
419 is needed.

420

## 421 **Materials & Methods**

### 422 **Study design**

423 The between-subject, double-blind, placebo-controlled study consisted of one experimental  
424 session in which participants received either 10 mg morphine sulfate or a placebo (60 mg  
425 mannitol).

### 426 **Participants**

427 Based on previous work that had investigated the effects of stress on social reward processing  
428 (Massaccesi et al., 2021) and the effects of similar compounds on stress responses (Bershad et al.,  
429 2018), we aimed at collecting data from 40 participants per group. The study sample included 82  
430 participants, of which 42 received morphine (MORPH) and 40 received a placebo (PLB). Two  
431 participants (MORPH) did not complete the session and were therefore not included in data  
432 analysis, yielding to a final sample size of 80 participants (40/group)<sup>3</sup>. Only female participants  
433 were included due to i) gender differences in opioid pharmacokinetics (Fillingim & Gear, 2004;  
434 Zubieta et al., 1999) and stress response (Kelly et al., 2008), ii) expected higher preference of  
435 same-sex touch in females than males (Stier & Hall, 1984; Suvilehto et al., 2015). Participants  
436 were tested during the luteal phase of their menstrual cycle, as assessed by self-report. All  
437 participants reported to be right-handed, to smoke less than ten cigarettes per week, to have no  
438 history of current or former drug abuse, to have a BMI between 17 and 35, and to be free of  
439 psychiatric or neurological disorders. Other exclusion criteria were: single or repeated use of any  
440 strong opioids in the last two years, use of hormonal contraceptives, regular intake of medications,

---

<sup>3</sup> Due to technical problems, EMG data from 6 (4 MORPH) participants and HR data from 1 participant (MORPH) were not recorded. Saliva samples from one participant (MORPH) are also missing.

441 current pregnancy or breastfeeding, suffering from impaired respiratory functions, respiratory  
 442 weakness or lung disease, injury/disease of the arms (making it impossible to squeeze with the  
 443 right hand and to be caressed on the left forearm). Participants were instructed to refrain from  
 444 eating, brushing their teeth and consuming caffeinated beverages, juices, and chewing gum in the  
 445 two hours preceding the test, as well as from smoking, doing physical activity and intaking alcohol  
 446 and medications in the 24 hours preceding the test. The two experimental groups did not differ  
 447 significantly in terms of age, BMI, autistic traits (short version of the German Autism Spectrum  
 448 Quotient, AQ-k; Freitag et al., 2007), general (State-Trait Anxiety Inventory, STAI; Spielberger  
 449 et al., 1970) and social (Liebowitz Social Anxiety Scale, LSAS; Heimberg et al., 1999) anxiety,  
 450 and social touch appreciation (Social Touch Questionnaire, STQ; Wilhelm et al., 2001) (Table 1).  
 451 The study was approved by the Ethics Committee of the Medical University of Vienna (EK  
 452 1393/2017) and was performed in line with the Declaration of Helsinki (World Medical  
 453 Association, 2013). All participants signed a consent form before taking part in the study.

454 *Table 1. Demographic and self-reported substance use characteristics of the participants.*

|                                   | MORPHINE      | PLACEBO       | <i>p</i> value |
|-----------------------------------|---------------|---------------|----------------|
| N                                 | 40            | 40            | ---            |
| Age (years)                       | 23.08 (3.08)  | 23.88 (3.86)  | 0.31           |
| BMI (kg/m <sup>2</sup> )          | 21.37 (3.38)  | 22.26 (2.66)  | 0.19           |
| Autism (AQ-k)                     | 6.45 (3.81)   | 5.65 (3.58)   | 0.34           |
| Anxiety (STAI)                    | 38.13 (9.43)  | 35.73 (8.27)  | 0.23           |
| Social Anxiety (LSAS)             | 36.73 (17.87) | 33.18 (19.02) | 0.39           |
| Social Touch Preferences (STQ)    | 25.33 (9.53)  | 27.10 (7.67)  | 0.36           |
| Drug use (% lifetime – last year) |               |               |                |
| Cannabis                          | 47.5 – 25     | 60 – 32.5     | ---            |
| Tranquilizers                     | 7.5 – 5       | 5 – 2.5       | ---            |
| Stimulants                        | 25 – 10       | 17.5 – 7.5    | ---            |
| Opiates                           | 7.5 – 0       | 2.5 – 0       | ---            |
| Hallucinogens                     | 12.5 – 2.5    | 12.5 – 2.5    | ---            |

Other

5 – 2.5

2.5 – 0

---

---

455 **Procedure**

456 The study was conducted at the Department of Psychiatry and Psychotherapy of the Medical  
457 University of Vienna. After completing an online survey to assess their eligibility, potential  
458 participants were first invited to a health screening (~45'), including blood examination,  
459 electrocardiogram, blood pressure measurement, and psychiatric interview (Mini-International  
460 Neuropsychiatric Interview; Sheehan et al., 1998). Eligible participants were then invited to the  
461 experimental session (~210'), which always started between 11:30 and 12:30 in order to control  
462 for cortisol diurnal fluctuations (Labuschagne et al., 2019). At the beginning of the session, urine  
463 drug and pregnancy tests were administered. After baseline mood and physiological measures were  
464 collected, participants received a standardized snack, and took the assigned capsule. Throughout  
465 the session, mood and physiological measures were obtained at regular intervals. The experimental  
466 tasks were completed between 60 and 160 min after drug administration, and included economic  
467 decision making, facial mimicry, emotion recognition, stress induction and social reward  
468 processing (see Fig.1A for an overview of the session timeline). Here we will focus on the last  
469 two, while the others will be reported elsewhere. Approximately 180 min. after pill administration,  
470 a blood sample was taken to confirm drug uptake (see Table S2 of the *Supplementary Material*).  
471 After completing the experimental session, participants were debriefed and received a financial  
472 compensation of 65€. Half of the sample was tested before and half during the COVID-19  
473 pandemic (see *Supplementary Material* for details regarding the employed safety measures and  
474 additional statistical analyses to assess possible effects of the pandemic and safety measures on  
475 the results).



476 **Drug administration**

477 Ten mg of morphine sulfate (Morapid®) were administered per oral to stimulate the activity of the  
478 MOR system with minimal subjective effects. Morphine is a selective MOR agonist and, for oral  
479 administration, has an average bioavailability of 30–40 %, a maximal effect (t-max) at 1–2 h after  
480 administration, and a half-life of 2–4 h (Lugo & Kern, 2002). Placebo consisted of capsules  
481 containing 650 mg of mannitol (sugar), visually identical to the ones containing morphine.

482 **Stress induction**

483 In order to induce a stress reaction in the participants, the Trier Social Stress Test (TSST;  
484 Kirschbaum et al., 1993) was employed. In the TSST, participants were given 3 minutes to prepare  
485 a 5-minute speech for a mock-job interview, followed by a 5-minute arithmetic task, in which they  
486 were asked to count backwards from 2043 in steps of 17 as fast and as accurate as possible. The  
487 speech and arithmetic tasks were completed in front of an evaluating panel (one male and one  
488 female confederates). Participants were told that these tasks would be video recorded via a camera  
489 located next to the examiners (no video was actually taped).

490 **Social Reward task**

491 ***Stimuli***

492 Gentle caresses in three different speeds (CT-optimal: 6 cm/s, non-CT-optimal: 21 cm/s and  
493 27 cm/s) were used as social rewards of different level of pleasantness (high, low, very low).  
494 Pleasantness of touch is high between 1 and 10 cm/s, and decreases between 10 and 30 cm/s  
495 (Löken et al., 2009) and CT-optimal touch has been shown to have a stress buffering effects,  
496 reducing arousal (Pawling et al., 2017) and distress following social exclusion (von Mohr et al.,  
497 2018), and increasing heart rate variability (Tricoli et al., 2017). The suitability of these stroking  
498 speeds has been confirmed in three previous independent studies from our group (Korb,

499 Götzendorfer, et al., 2020; Korb, Massaccesi, et al., 2020; Massaccesi et al., 2021). Caressed were  
500 delivered over a previously-marked nine-cm area on participants' left forearm (measurement  
501 started from the wrist towards the elbow) by a female experimenter, moving her index and middle  
502 fingers back and forth in the marked area of the forearm (Figure 1B). Touch delivery was guided  
503 by auditory rhythms, which matched the frequency of the stimulation, over headphones. The  
504 experimenter administering the touch was seated on the other side of a curtain, used to limit the  
505 participants' field of view to the monitor (Figure 1B). All experimenters were presented as trained  
506 masseurs, wore standardized clothes (white t-shirt and beige trousers) to minimize differences in  
507 their appearance, and underwent extensive training on the tactile stimulation delivery.

#### 508 ***Task***

509 The Social Reward task (Korb, Götzendorfer, et al., 2020; Massaccesi et al., 2021) consisted of  
510 two blocks of 16 trials, separated by a 5-minute break. To avoid habituation to the touch, the site  
511 of application (left or right area of the forearm) was alternated within the two blocks, in a counter-  
512 balanced order. Before starting the task, participants experienced each type of touch once. Each  
513 trial was structured as follow (see Figure 1C): i) announcement of the best attainable reward (high  
514 or low, 16 trials each, 3s); ii) rating of subjective wanting via a VAS ranging from -10 (not at all)  
515 to +10 (very much) (no time limit); iii) effort task (4s), requiring to squeeze a hand-dynamometer  
516 (HD-BTA, Vernier Software & Technology, USA) with the right hand, in order to obtain the  
517 announced reward – the applied force, displayed via an online visual-feedback, was expressed as  
518 percentage of the participants' MVC, measured immediately before the task, and translated into  
519 the probability of obtaining the announced reward (0–100%); iv) announcement of the reward  
520 obtained (high, low, or – if insufficient force had been exerted – very low; 2s); v) reward delivery

521 (6s); vi) relax phase (5s); vii) rating of subjective liking via a VAS ranging from -10 (not at all) to  
522 +10 (very much) (no time limit). At the end of the task, participants' MVC was measured again.  
523 The task was implemented in MATLAB 2014b (MathWorks, Inc) and presented on an LCD  
524 monitor with a resolution of  $1280 \times 1024$  pixels.

## 525 **Facial EMG**

526 Facial EMG was recorded throughout the Social Reward task, using a g.USBamp amplifier (g.tec  
527 Medical Engineering GmbH) and the software Matlab (MathWorks, Inc). Participants' face areas  
528 were prepared using alcohol, water and an abrasive paste. Reusable Ag/AgCl electrodes were then  
529 attached bipolarly according to guidelines (Fridlund & Cacioppo, 1986) on the left corrugator  
530 supercilii (corrugator), and zygomaticus major (zygomaticus) muscles. A ground electrode was  
531 attached to the participants' forehead and a reference electrode on the left mastoid. The EMG data  
532 were sampled at 1200 Hz with impedances below 20 k $\Omega$ .

533 Each trial was divided in 4 epochs: Anticipation Pre-Effort (announcement of best attainable  
534 reward, 3s), Anticipation Post-Effort (announcement of attained reward, 2s), Delivery (touch  
535 administration, 6s), and Relax (relax phase after reward delivery, 5s). EMG was first averaged  
536 over 1s time-windows and then over the epoch total duration. For each trial, values in the four  
537 epochs were expressed as percentage of the average amplitude during the fixation cross at the  
538 beginning of that trial (baseline, 2s). Outliers in baseline (defined as values 3 SDs over the subjects'  
539 average baseline) were substituted with the average of the baseline preceding and following that  
540 trial. The extracted epochs were visually inspected in order to identify signal artifacts which were  
541 then removed (33 epochs for corrugator and 51 epochs for zygomaticus across 5 participants). As  
542 data were extremely skewed, for each subject, epochs over the subject's mean  $\pm 3$  SD were

543 removed (average removed epochs per subject: corrugator:  $M = 2.4$ ,  $SD = 1.2$ ; zygomaticus:  $M =$   
544  $3.1$ ,  $SD = 1.1$ ), and the remaining data were transformed using natural logarithmic transformation.

### 545 **Subjective measures of stress and mood**

546 During the session, participants completed self-report questionnaires assessing their mood and  
547 subjective state at regular intervals. Happiness, calmness, relaxation, feeling good, as well as  
548 stress, tension, anxiety and feeling bad were assessed via visual analogue scales ranging from +1  
549 (“not at all”) to +101 (“very much”) at 7 time points (T1-T7; see Figure 1A). Positive and negative  
550 mood items were averaged to constitute the “Positive mood” and “Negative mood” scales used for  
551 statistical analyses. The German short version Profile of Mood States (POMS; Albani et al., 2005),  
552 consisting of 4 subscales for current mood (depression, vigor, fatigue, and displeasure), was  
553 administered at 5 time points (T1, T2, T3, T5, T6; see Figure 1A). During the preparation phase  
554 of the TSST (T4), anticipatory cognitive appraisal (PASA; Gaab et al., 2005) was also assessed.  
555 Lastly, after completion of the TSST (T5), participants’ satisfaction towards their performance at  
556 the speech and math tasks was assessed on a VAS scale ranging from 1 (“not at all”) to +101 (“very  
557 much”).

### 558 **Physiological measures of stress**

559 Heart rate was recorded using a chest strap (Polar H10; Polar Electro Oy, Kempele, Finland). Data  
560 were collected over a 10-minute period at baseline, during TSST, and during the Social Reward  
561 task. Values in each time window were then averaged for statistical analyses.

562 Saliva samples were collected via passive drool method using Salicaps (IBL, Hamburg, Germany)  
563 at 6 time points (T1, T2, T3, T5, T6, T7; see Figure 1A). Free cortisol concentration in saliva was  
564 determined by using commercial luminescence immunosorbent assay (LUM; IBL, Hamburg,

565 Germany). Salivary alpha-amylase activity was measured using a kinetic colorimetric test and  
566 reagents obtained from DiaSys Diagnostic Systems (Holzheim, Germany). For heart rate, salivary  
567 cortisol and alpha-amylase analyses, outliers were defined as subjects with a baseline value (T1)  
568 3 SDs over the mean baseline of the sample. This procedure led to the exclusion of two participants  
569 for cortisol (1 MORPH, 1 PLB) and of one participant for alpha-amylase (MORPH).

### 570 **Drug effects on cognitive functions and side-effects**

571 To assess potential drug effects on cognitive functions, participants completed the Trail Making  
572 Test (TMT; Reitan, 1958) and the Digit Symbol Substitution Test (DSST; Wechsler, 1939) 55 min  
573 after drug administration. Regarding subjective drug effects, participants filled out a self-report  
574 questionnaire assessing nausea, dry mouth and other 24 possible side-effects on a 4-point Likert  
575 scale (with the anchors 1 = “not at all” and 4 = “very much”) at baseline (T1), as well as 50 min  
576 (T2) and 160 min (T7) after drug administration (see Figure 1A).

### 577 **Statistical analyses**

578 Statistical analyses were conducted in R (R Core Team, 2019). Drug effects on subjective and  
579 physiological state measures were analyzed using LMMs with Drug (MORPH, PLB) and Time as  
580 fixed effects and by-subject random intercepts. Drug effects on ratings of wanting and liking, and  
581 force exerted were analyzed with LMMs including Drug (MORPH, PLB) and Reward Level (high,  
582 low, and very low in the case of liking) as fixed effects, and by-subject random intercepts and  
583 slopes for Reward Level. For EMG data, LMMs for each muscle and task phase were fitted,  
584 including Drug (MORPH, PLB) and trial-by-trial Wanting (for anticipation) or Liking (for  
585 consumption) as fixed effects, and by-subject random intercepts and slopes for Wanting/Liking.  
586 In case of model nonconvergence or singularity, random effects with the lowest cumulative variance  
587 were removed and transformed into the corresponding complex random intercept (CRI; Scandola

588 & Tidoni, 2021). Group differences in age, BMI, and personality traits, as well as drug effects on  
589 executive functions, PASA, satisfaction for the TSST performance and side-effects were assessed  
590 using independent two-sided t-tests.

591 LMMs were computed using the `lmer()` function of the *lme4* package (Bates et al., 2015). Type-  
592 III F-tests were computed with the Satterthwaite degrees of freedom approximation, using the  
593 `anova()` function of the *lmerTest* package (Kuznetsova et al., 2017). Significant interactions were  
594 further analyzed with multiple comparisons using the function `emmeans()` from the homonymous  
595 package (Lenth, 2021). Results from all LMMs and multiple comparisons were controlled for the  
596 false discovery rate (FDR) associated with multiple testing using the Benjamini–Hochberg method  
597 (Benjamini & Hochberg, 1995). Data and analysis scripts are available online  
598 (<https://osf.io/gbd24/>).

## 599 **Funding**

600 The study was supported by the Vienna Science and Technology Fund (WWTF) with a grant  
601 (CS15-003) awarded to Giorgia Silani and Matthäus Willeit, as well as by the Uni:docs scholarship  
602 and the JUWI Covid-19 fellowship of the University of Vienna, and the OeAD Marietta Blau grant  
603 awarded to Claudia Massaccesi. Funders had no role in study design, data collection and analyses,  
604 decision to publish or preparation of the manuscript.

## 605 **Acknowledgments**

606 We thank Gheorghe L. Preda and Carina Bum for their contribution to carry out the medical  
607 procedures during data collection, Sebastian Korb for valuable intellectual input, Nadine Skoluda  
608 for her support with the saliva analysis, and all the students who contributed to data collection.

609 **Authors contribution**

610 CM: Conceptualization of the study, Data curation, Software, Formal analysis, Supervision,  
611 Investigation, Visualization, Methodology, Project administration, Funding acquisition, Writing -  
612 original draft, review and editing; MW: Contribution to the conceptualization of the design, Project  
613 administration, Medical testing, Funding acquisition, Writing - review and editing; BBQ:  
614 Contribution to the conceptualization of the design, Writing - review and editing; UMN:  
615 Contribution to the conceptualization of the design, Curation of saliva analysis, Writing - review  
616 and editing; CL: Contribution to the conceptualization of the design, Writing - review and editing;  
617 DM: Curation of blood analyses; GS: Conceptualization of the study, Supervision, Methodology,  
618 Funding acquisition, Project administration, Writing - review and editing.  
619 All authors approved the final version of the manuscript.

620 **Competing interests**

621 No competing interests declared.

622 **References**

623 Albani, C., Blaser, G., Geyer, M., Schmutzer, G., Brähler, E., Bailer, H., & Grulke, N. (2005).  
624 The German short version of “Profile of Mood States” (POMS): Psychometric evaluation  
625 in a representative sample. *PPmP - Psychotherapie · Psychosomatik · Medizinische*  
626 *Psychologie*, 55(07), 324–330. <https://doi.org/10.1055/s-2004-834727>  
627 Ali, N., Cooperman, C., Nitschke, J. P., Baldwin, M. W., & Pruessner, J. C. (2020). The effects  
628 of suppressing the biological stress systems on social threat-assessment following acute  
629 stress. *Psychopharmacology*, 237(10), 3047–3056. [https://doi.org/10.1007/s00213-020-](https://doi.org/10.1007/s00213-020-05591-z)  
630 05591-z

- 631 Ali, N., Nitschke, J. P., Cooperman, C., & Pruessner, J. C. (2017). Suppressing the endocrine and  
632 autonomic stress systems does not impact the emotional stress experience after  
633 psychosocial stress. *Psychoneuroendocrinology*, *78*, 125–130.  
634 <https://doi.org/10.1016/j.psyneuen.2017.01.015>
- 635 Bates, D., Mächler, M., Bolker, B., & Walker, S. (2015). Fitting Linear Mixed-Effects Models  
636 Using lme4. *Journal of Statistical Software*, *67*(1), 1–48.  
637 <https://doi.org/10.18637/jss.v067.i01>
- 638 Benjamini, Y., & Hochberg, Y. (1995). Controlling the False Discovery Rate: A Practical and  
639 Powerful Approach to Multiple Testing. *Journal of the Royal Statistical Society: Series B*  
640 (*Methodological*), *57*(1), 289–300. <https://doi.org/10.1111/j.2517-6161.1995.tb02031.x>
- 641 Bershad, A. K., Miller, M. A., Norman, G. J., & de Wit, H. (2018). Effects of opioid- and non-  
642 opioid analgesics on responses to psychosocial stress in humans. *Hormones and*  
643 *Behavior*, *102*, 41–47. <https://doi.org/10.1016/j.yhbeh.2018.04.009>
- 644 Bershad, A. K., Seiden, J. A., & de Wit, H. (2016). Effects of buprenorphine on responses to  
645 social stimuli in healthy adults. *Psychoneuroendocrinology*, *63*, 43–49.  
646 <https://doi.org/10.1016/j.psyneuen.2015.09.011>
- 647 Bloomfield, M. A., McCutcheon, R. A., Kempton, M., Freeman, T. P., & Howes, O. (2019). The  
648 effects of psychosocial stress on dopaminergic function and the acute stress response.  
649 *ELife*, *8*, e46797. <https://doi.org/10.7554/eLife.46797>
- 650 Buchel, C., Miedl, S., & Sprenger, C. (2018). Hedonic processing in humans is mediated by an  
651 opioidergic mechanism in a mesocorticolimbic system. *ELife*, *7*, e39648.  
652 <https://doi.org/10.7554/eLife.39648>



- 653 Cacioppo, J. T., & Cacioppo, S. (2014). Social Relationships and Health: The Toxic Effects of  
654 Perceived Social Isolation. *Social and Personality Psychology Compass*, 8(2), 58–72.  
655 <https://doi.org/10.1111/spc3.12087>
- 656 Cacioppo, J. T., Petty, R. E., & Morris, K. J. (1985). Semantic, Evaluative, and Self-Referent  
657 Processing: Memory, Cognitive Effort, and Somatovisceral Activity. *Psychophysiology*,  
658 22(4), 371–384. <https://doi.org/10.1111/j.1469-8986.1985.tb01618.x>
- 659 Chelnokova, O., Laeng, B., Eikemo, M., Riegels, J., Løseth, G., Maurud, H., Willoch, F., &  
660 Leknes, S. (2014). Rewards of beauty: The opioid system mediates social motivation in  
661 humans. *Molecular Psychiatry*, 19(7), 746–747. <https://doi.org/10.1038/mp.2014.1>
- 662 Cohen, B. H., Davidson, R. J., Senulis, J. A., Saron, C. D., & Weisman, D. R. (1992). Muscle  
663 tension patterns during auditory attention. *Biological Psychology*, 33(2–3), 133–156.  
664 [https://doi.org/10.1016/0301-0511\(92\)90028-s](https://doi.org/10.1016/0301-0511(92)90028-s)
- 665 de Morree, H. M., & Marcora, S. M. (2010). The face of effort: Frowning muscle activity reflects  
666 effort during a physical task. *Biological Psychology*, 85(3), 377–382.  
667 <https://doi.org/10.1016/j.biopsycho.2010.08.009>
- 668 Donaldson, Z. R., & Young, L. J. (2008). Oxytocin, Vasopressin, and the Neurogenetics of  
669 Sociality. *Science*, 322(5903), 900–904. <https://doi.org/10.1126/science.1158668>
- 670 Eikemo, M., Løseth, G. E., Johnstone, T., Gjerstad, J., Willoch, F., & Leknes, S. (2016). Sweet  
671 taste pleasantness is modulated by morphine and naltrexone. *Psychopharmacology*,  
672 233(21–22), 3711–3723. <https://doi.org/10.1007/s00213-016-4403-x>
- 673 Fabre-Nys, C., Meller, R. E., & Keverne, E. B. (1982). Opiate antagonists stimulate affiliative  
674 behaviour in monkeys. *Pharmacology Biochemistry and Behavior*, 16(4), 653–659.  
675 [https://doi.org/10.1016/0091-3057\(82\)90432-4](https://doi.org/10.1016/0091-3057(82)90432-4)

- 676 Fillingim, R. B., & Gear, R. W. (2004). Sex differences in opioid analgesia: Clinical and  
677 experimental findings. *European Journal of Pain*, 8(5), 413–425.  
678 <https://doi.org/10.1016/j.ejpain.2004.01.007>
- 679 Freitag, C. M., Retz-Junginger, P., Retz, W., Seitz, C., Palmason, H., Meyer, J., Rösler, M., &  
680 von Gontard, A. (2007). Evaluation der deutschen Version des Autismus-Spektrum-  
681 Quotienten (AQ)—Die Kurzversion AQ-k. *Zeitschrift Für Klinische Psychologie Und*  
682 *Psychotherapie*, 36(4), 280–289. <https://doi.org/10.1026/1616-3443.36.4.280>
- 683 Fridlund, A. J., & Cacioppo, J. T. (1986). Guidelines for Human Electromyographic Research.  
684 *Psychophysiology*, 23(5), 567–589. <https://doi.org/10.1111/j.1469-8986.1986.tb00676.x>
- 685 Gaab, J., Rohleder, N., Nater, U. M., & Ehlert, U. (2005). Psychological determinants of the  
686 cortisol stress response: The role of anticipatory cognitive appraisal.  
687 *Psychoneuroendocrinology*, 30(6), 599–610.  
688 <https://doi.org/10.1016/j.psyneuen.2005.02.001>
- 689 Gerra, G., Zaimovic, A., Mascetti, G. G., Gardini, S., Zambelli, U., Timpano, M., Raggi, M. A.,  
690 & Brambilla, F. (2001). Neuroendocrine responses to experimentally-induced  
691 psychological stress in healthy humans. *Psychoneuroendocrinology*, 26(1), 91–107.  
692 [https://doi.org/10.1016/S0306-4530\(00\)00046-9](https://doi.org/10.1016/S0306-4530(00)00046-9)
- 693 Heimberg, R. G., Horner, K. J., Juster, H. R., Safren, S. A., Brown, E. J., Schneier, F. R., &  
694 Liebowitz, M. R. (1999). Psychometric properties of the Liebowitz Social Anxiety Scale.  
695 *Psychological Medicine*, 29(1), 199–212. <https://doi.org/10.1017/S0033291798007879>
- 696 Het, S., Schoofs, D., Rohleder, N., & Wolf, O. T. (2012). Stress-Induced Cortisol Level  
697 Elevations Are Associated With Reduced Negative Affect After Stress: Indications for a

- 698 Mood-Buffering Cortisol Effect. *Psychosomatic Medicine*, 74(1), 23–32.
- 699 <https://doi.org/10.1097/PSY.0b013e31823a4a25>
- 700 Het, S., & Wolf, O. T. (2007). Mood changes in response to psychosocial stress in healthy young  
701 women: Effects of pretreatment with cortisol. *Behavioral Neuroscience*, 121(1), 11–20.  
702 <https://doi.org/10.1037/0735-7044.121.1.11>
- 703 Hickey, C., Chelazzi, L., & Theeuwes, J. (2010). Reward Changes Salience in Human Vision via  
704 the Anterior Cingulate. *Journal of Neuroscience*, 30(33), 11096–11103.
- 705 Hickey, C., & van Zoest, W. (2012). Reward creates oculomotor salience. *Current Biology*,  
706 22(7), R219–R220. <https://doi.org/10.1016/j.cub.2012.02.007>
- 707 Holly, E. N., & Miczek, K. A. (2016). Ventral tegmental area dopamine revisited: Effects of  
708 acute and repeated stress. *Psychopharmacology*, 233(2), 163–186.  
709 <https://doi.org/10.1007/s00213-015-4151-3>
- 710 Hsu, D. T., Sanford, B. J., Meyers, K. K., Love, T. M., Hazlett, K. E., Wang, H., Ni, L., Walker,  
711 S. J., Mickey, B. J., Korycinski, S. T., Koeppe, R. A., Crocker, J. K., Langenecker, S. A.,  
712 & Zubieta, J.-K. (2013). Response of the  $\mu$ -opioid system to social rejection and  
713 acceptance. *Molecular Psychiatry*, 18(11), 1211–1217.  
714 <https://doi.org/10.1038/mp.2013.96>
- 715 Inagaki, T. K., Hazlett, L. I., & Andreescu, C. (2020). Opioids and social bonding: Effect of  
716 naltrexone on feelings of social connection and ventral striatum activity to close others.  
717 *Journal of Experimental Psychology: General*, 149(4), 732–745.  
718 <https://doi.org/10.1037/xge0000674>

- 719 Inagaki, T. K., Irwin, M. R., & Eisenberger, N. I. (2015). Blocking opioids attenuates physical  
720 warmth-induced feelings of social connection. *Emotion (Washington, D.C.)*, *15*(4), 494–  
721 500. <https://doi.org/10.1037/emo0000088>
- 722 Inagaki, T. K., Ray, L. A., Irwin, M. R., Way, B. M., & Eisenberger, N. I. (2016). Opioids and  
723 social bonding: Naltrexone reduces feelings of social connection. *Social Cognitive and*  
724 *Affective Neuroscience*, *11*(5), 728–735. <https://doi.org/10.1093/scan/nsw006>
- 725 Kelly, M. M., Tyrka, A. R., Anderson, G. M., Price, L. H., & Carpenter, L. L. (2008). Sex  
726 differences in emotional and physiological responses to the Trier Social Stress Test.  
727 *Journal of Behavior Therapy and Experimental Psychiatry*, *39*(1), 87–98.  
728 <https://doi.org/10.1016/j.jbtep.2007.02.003>
- 729 Keverne, E. B., Martensz, N. D., & Tuite, B. (1989). Beta-endorphin concentrations in  
730 cerebrospinal fluid of monkeys are influenced by grooming relationships.  
731 *Psychoneuroendocrinology*, *14*(1), 155–161. [https://doi.org/10.1016/0306-](https://doi.org/10.1016/0306-4530(89)90065-6)  
732 [4530\(89\)90065-6](https://doi.org/10.1016/0306-4530(89)90065-6)
- 733 Kirsch, L. P., Krahe, C., Blom, N., Crucianelli, L., Moro, V., Jenkinson, P. M., & Fotopoulou, A.  
734 (2017). Reading the Mind in the Touch: Neurophysiological Specificity in the  
735 Communication of Emotions by Touch. *Neuropsychologia*.  
736 <https://doi.org/10.1016/j.neuropsychologia.2017.05.024>
- 737 Kirschbaum, C., Pirke, K. M., & Hellhammer, D. H. (1993). The 'Trier Social Stress Test'—A  
738 tool for investigating psychobiological stress responses in a laboratory setting.  
739 *Neuropsychobiology*, *28*(1–2), 76–81. <https://doi.org/10.1159/000119004>
- 740 Korb, S., Götzendorfer, S. J., Massaccesi, C., Sezen, P., Graf, I., Willeit, M., Eisenegger, C., &  
741 Silani, G. (2020). Dopaminergic and opioidergic regulation during anticipation and

- 742 consumption of social and nonsocial rewards. *ELife*, 9, e55797.
- 743 <https://doi.org/10.7554/eLife.55797>
- 744 Korb, S., Massaccesi, C., Gartus, A., Lundström, J. N., Rumiati, R., Eisenegger, C., & Silani, G.
- 745 (2020). Facial responses of adult humans during the anticipation and consumption of
- 746 touch and food rewards. *Cognition*, 194, 104044.
- 747 <https://doi.org/10.1016/j.cognition.2019.104044>
- 748 Kumar, P., Berghorst, L. H., Nickerson, L. D., Dutra, S. J., Goer, F. K., Greve, D. N., &
- 749 Pizzagalli, D. A. (2014). Differential effects of acute stress on anticipatory and
- 750 consummatory phases of reward processing. *Neuroscience*, 266(Supplement C), 1–12.
- 751 <https://doi.org/10.1016/j.neuroscience.2014.01.058>
- 752 Kuznetsova, A., Brockhoff, P. B., & Christensen, R. H. B. (2017). lmerTest Package: Tests in
- 753 Linear Mixed Effects Models. *Journal of Statistical Software*, 82(1), 1–26.
- 754 <https://doi.org/10.18637/jss.v082.i13>
- 755 Labuschagne, I., Grace, C., Rendell, P., Terrett, G., & Heinrichs, M. (2019). An introductory
- 756 guide to conducting the Trier Social Stress Test. *Neuroscience and Biobehavioral*
- 757 *Reviews*, 107, 686–695. <https://doi.org/10.1016/j.neubiorev.2019.09.032>
- 758 Leknes, S., & Tracey, I. (2008). A common neurobiology for pain and pleasure. *Nature Reviews.*
- 759 *Neuroscience*, 9(4), 314–320. <https://doi.org/10.1038/nrn2333>
- 760 Lenth, R. V. (2021). *emmeans: Estimated marginal means, aka least-squares means. R package*
- 761 *version 1.5. 4.*
- 762 Lewis, A. H., Porcelli, A. J., & Delgado, M. R. (2014). The effects of acute stress exposure on
- 763 striatal activity during Pavlovian conditioning with monetary gains and losses. *Frontiers*
- 764 *in Behavioral Neuroscience*, 8. <https://doi.org/10.3389/fnbeh.2014.00179>

- 765 Löken, L. S., Wessberg, J., Morrison, I., McGlone, F., & Olausson, H. (2009). Coding of  
766 pleasant touch by unmyelinated afferents in humans. *Nature Neuroscience*, *12*(5), 547–  
767 548. <https://doi.org/10.1038/nn.2312>
- 768 Løseth, G. E., Eikemo, M., & Leknes, S. (2019). Effects of opioid receptor stimulation and  
769 blockade on touch pleasantness: A double-blind randomised trial. *Social Cognitive and*  
770 *Affective Neuroscience*, *14*(4), 411–422. <https://doi.org/10.1093/scan/nsz022>
- 771 Løseth, G. E., Ellingsen, D.-M., & Leknes, S. (2014). State-dependent  $\mu$ -opioid modulation of  
772 social motivation. *Frontiers in Behavioral Neuroscience*, *8*, 430.  
773 <https://doi.org/10.3389/fnbeh.2014.00430>
- 774 Lugo, R. A., & Kern, S. E. (2002). Clinical Pharmacokinetics of Morphine. *Journal of Pain &*  
775 *Palliative Care Pharmacotherapy*, *16*(4), 5–18. [https://doi.org/10.1080/J354v16n04\\_02](https://doi.org/10.1080/J354v16n04_02)
- 776 Machin, A. J., & Dunbar, R. I. M. (2011). The brain opioid theory of social attachment: A review  
777 of the evidence. *Behaviour*, *148*(9–10), 985–1025.  
778 <https://doi.org/10.1163/000579511X596624>
- 779 Manninen, S., Tuominen, L., Dunbar, R. I., Karjalainen, T., Hirvonen, J., Arponen, E., Hari, R.,  
780 Jääskeläinen, I. P., Sams, M., & Nummenmaa, L. (2017). Social Laughter Triggers  
781 Endogenous Opioid Release in Humans. *Journal of Neuroscience*, *37*(25), 6125–6131.  
782 <https://doi.org/10.1523/JNEUROSCI.0688-16.2017>
- 783 Martel, F. L., Nevison, C. M., Simpson, M. J. A., & Keverne, E. B. (1995). Effects of opioid  
784 receptor blockade on the social behavior of rhesus monkeys living in large family groups.  
785 *Developmental Psychobiology*, *28*(2), 71–84. <https://doi.org/10.1002/dev.420280202>

- 786 Massaccesi, C., Korb, S., Skoluda, N., Nater, U. M., & Silani, G. (2021). Effects of Appetitive  
787 and Aversive Motivational States on Wanting and Liking of Interpersonal Touch.  
788 *Neuroscience*, 464, 12–25. <https://doi.org/10.1016/j.neuroscience.2020.09.025>
- 789 Mayo, L. M., Lindé, J., Olausson, H., Heilig, M., & Morrison, I. (2018). Putting a good face on  
790 touch: Facial expression reflects the affective valence of caress-like touch across  
791 modalities. *Biological Psychology*, 137, 83–90.  
792 <https://doi.org/10.1016/j.biopsycho.2018.07.001>
- 793 McEwen, B. S. (1998). Stress, adaptation, and disease. Allostasis and allostatic load. *Annals of*  
794 *the New York Academy of Sciences*, 840, 33–44. <https://doi.org/10.1111/j.1749->  
795 [6632.1998.tb09546.x](https://doi.org/10.1111/j.1749-6632.1998.tb09546.x)
- 796 Meller, R. E., Keverne, E. B., & Herbert, J. (1980). Behavioural and endocrine effects of  
797 naltrexone in male talapoin monkeys. *Pharmacology Biochemistry and Behavior*, 13(5),  
798 663–672. [https://doi.org/10.1016/0091-3057\(80\)90010-6](https://doi.org/10.1016/0091-3057(80)90010-6)
- 799 Morrison, I. (2016). Keep Calm and Cuddle on: Social Touch as a Stress Buffer. *Adaptive*  
800 *Human Behavior and Physiology*, 2(4), 344–362. <https://doi.org/10.1007/s40750-016->  
801 [0052-x](https://doi.org/10.1007/s40750-016-0052-x)
- 802 Morrison, I., Löken, L. S., & Olausson, H. (2010). The skin as a social organ. *Experimental*  
803 *Brain Research*, 204(3), 305–314. <https://doi.org/10.1007/s00221-009-2007-y>
- 804 Pan, Z. Z. (1998).  $\mu$ -Opposing actions of the  $\kappa$ -opioid receptor. *Trends in Pharmacological*  
805 *Sciences*, 19(3), 94–98. [https://doi.org/10.1016/S0165-6147\(98\)01169-9](https://doi.org/10.1016/S0165-6147(98)01169-9)
- 806 Panksepp, J. (1998). *Affective Neuroscience: The Foundations of Human and Animal Emotions*.  
807 Oxford University Press.

- 808 Panksepp, J., & Bishop, P. (1981). An autoradiographic map of (3H)diprenorphine binding in rat  
809 brain: Effects of social interaction. *Brain Research Bulletin*, 7(4), 405–410.
- 810 Panksepp, J., Herman, B. H., Vilberg, T., Bishop, P., & DeEskinazi, F. G. (1980). Endogenous  
811 opioids and social behavior. *Neuroscience & Biobehavioral Reviews*, 4(4), 473–487.  
812 [https://doi.org/10.1016/0149-7634\(80\)90036-6](https://doi.org/10.1016/0149-7634(80)90036-6)
- 813 Pawling, R., Cannon, P. R., McGlone, F. P., & Walker, S. C. (2017). C-tactile afferent  
814 stimulating touch carries a positive affective value. *PLOS ONE*, 12(3), e0173457.  
815 <https://doi.org/10.1371/journal.pone.0173457>
- 816 Pechnick, R. N. (1993). Effects of Opioids on the Hypothalamo-Pituitary-Adrenal Axis. *Annual*  
817 *Review of Pharmacology and Toxicology*, 33(1), 353–382.  
818 <https://doi.org/10.1146/annurev.pa.33.040193.002033>
- 819 Petrowski, K., Wintermann, G.-B., & Siepmann, M. (2012). Cortisol response to repeated  
820 psychosocial stress. *Applied Psychophysiology and Biofeedback*, 37(2), 103–107.  
821 <https://doi.org/10.1007/s10484-012-9183-4>
- 822 Pool, E., Brosch, T., Delplanque, S., & Sander, D. (2015). Stress increases cue-triggered  
823 “wanting” for sweet reward in humans. *Journal of Experimental Psychology. Animal*  
824 *Learning and Cognition*, 41(2), 128–136. <https://doi.org/10.1037/xan0000052>
- 825 Pruessner, J. C., Kirschbaum, C., Meinlschmid, G., & Hellhammer, D. H. (2003). Two formulas  
826 for computation of the area under the curve represent measures of total hormone  
827 concentration versus time-dependent change. *Psychoneuroendocrinology*, 28(7), 916–  
828 931. [https://doi.org/10.1016/S0306-4530\(02\)00108-7](https://doi.org/10.1016/S0306-4530(02)00108-7)
- 829 Quednow, B. B., Csomor, P. A., Chmiel, J., Beck, T., & Vollenweider, F. X. (2008).  
830 Sensorimotor gating and attentional set-shifting are improved by the  $\mu$ -opioid receptor



- 831 agonist morphine in healthy human volunteers. *International Journal of*  
832 *Neuropsychopharmacology*, 11(5), 655–669.  
833 <https://doi.org/10.1017/S1461145707008322>
- 834 R Core Team. (2019). *R: A language and environment for statistical computing*. R Foundation  
835 for Statistical Computing.
- 836 Ree, A., Bendas, J., Pabel, L., Croy, I., & Sailer, U. (2020). Right between the eyes: Corrugator  
837 muscle activity tracks the changing pleasantness of repeated slow stroking touch.  
838 *Physiology & Behavior*, 222, 112903. <https://doi.org/10.1016/j.physbeh.2020.112903>
- 839 Reitan, R. M. (1958). Validity of the Trail Making Test as an Indicator of Organic Brain  
840 Damage. *Perceptual and Motor Skills*, 8(3), 271–276.  
841 <https://doi.org/10.2466/pms.1958.8.3.271>
- 842 Sato, W., Minemoto, K., Ikegami, A., Nakauma, M., Funami, T., & Fushiki, T. (2020). Facial  
843 EMG Correlates of Subjective Hedonic Responses During Food Consumption. *Nutrients*,  
844 12(4). <https://doi.org/10.3390/nu12041174>
- 845 Scandola, M., & Tidoni, E. (2021). *The development of a standard procedure for the optimal*  
846 *reliability-feasibility trade-off in Multilevel Linear Models analyses in Psychology and*  
847 *Neuroscience*. PsyArXiv. <https://doi.org/10.31234/osf.io/kfhgv>
- 848 Sheehan, D. V., Lecrubier, Y., Sheehan, K. H., Amorim, P., Janavs, J., Weiller, E., Hergueta, T.,  
849 Baker, R., & Dunbar, G. C. (1998). The Mini-International Neuropsychiatric Interview  
850 (M.I.N.I.): The Development and Validation of a Structured Diagnostic Psychiatric  
851 Interview for DSM-IV and ICD-10. *The Journal of Clinical Psychiatry*, 59(suppl 20), 0–  
852 0.

- 853 Spielberger, C. D., Gorsuch, R. L., & Lushene, R. E. (1970). *Manual for the State-Trait Anxiety*  
854 *Inventory*. <http://ubir.buffalo.edu/xmlui/handle/10477/2895>
- 855 Stier, D. S., & Hall, J. A. (1984). Gender differences in touch: An empirical and theoretical  
856 review. *Journal of Personality and Social Psychology*, 47(2), 440–459.  
857 <https://doi.org/10.1037/0022-3514.47.2.440>
- 858 Suvilehto, J. T., Glerean, E., Dunbar, R. I. M., Hari, R., & Nummenmaa, L. (2015). Topography  
859 of social touching depends on emotional bonds between humans. *Proceedings of the*  
860 *National Academy of Sciences*, 112(45), 13811–13816.  
861 <https://doi.org/10.1073/pnas.1519231112>
- 862 Tchalova, K., & MacDonald, G. (2020). Opioid receptor blockade inhibits self-disclosure during  
863 a closeness-building social interaction. *Psychoneuroendocrinology*, 113, 104559.  
864 <https://doi.org/10.1016/j.psyneuen.2019.104559>
- 865 Theeuwes, J., & Belopolsky, A. V. (2012). Reward grabs the eye: Oculomotor capture by  
866 rewarding stimuli. *Vision Research*, 74, 80–85.  
867 <https://doi.org/10.1016/j.visres.2012.07.024>
- 868 Tricoli, C., Croy, I., Steudte-Schmiedgen, S., Olausson, H., & Sailer, U. (2017). Heart rate  
869 variability is enhanced by long-lasting pleasant touch at CT-optimized velocity.  
870 *Biological Psychology*, 128, 71–81. <https://doi.org/10.1016/j.biopsycho.2017.07.007>
- 871 Uchino, B. N. (2006). Social Support and Health: A Review of Physiological Processes  
872 Potentially Underlying Links to Disease Outcomes. *Journal of Behavioral Medicine*,  
873 29(4), 377–387. <https://doi.org/10.1007/s10865-006-9056-5>

- 874 Van Boxtel, A., & Jessurun, M. (1993). Amplitude and bilateral coherency of facial and jaw-  
875 elevator EMG activity as an index of effort during a two-choice serial reaction task.  
876 *Psychophysiology*, 30(6), 589–604. <https://doi.org/10.1111/j.1469-8986.1993.tb02085.x>
- 877 Vanderschuren, L. J. M. J., Stein, E. A., Wiegant, V. M., & Van Ree, J. M. (1995). Social play  
878 alters regional brain opioid receptor binding in juvenile rats. *Brain Research*, 680(1),  
879 148–156. [https://doi.org/10.1016/0006-8993\(95\)00256-P](https://doi.org/10.1016/0006-8993(95)00256-P)
- 880 von Mohr, M., Krahé, C., Beck, B., & Fotopoulou, A. (2018). The social buffering of pain by  
881 affective touch: A laser-evoked potential study in romantic couples. *Social Cognitive and*  
882 *Affective Neuroscience*, 13(11), 1121–1130. <https://doi.org/10.1093/scan/nsy085>
- 883 Waterink, W., & van Boxtel, A. (1994). Facial and jaw-elevator EMG activity in relation to  
884 changes in performance level during a sustained information processing task. *Biological*  
885 *Psychology*, 37(3), 183–198. [https://doi.org/10.1016/0301-0511\(94\)90001-9](https://doi.org/10.1016/0301-0511(94)90001-9)
- 886 Wechsler, D. (1939). *The measurement of adult intelligence* (pp. ix, 226). Williams & Wilkins  
887 Co. <https://doi.org/10.1037/10020-000>
- 888 Wilhelm, F. H., Kochar, A. S., Roth, W. T., & Gross, J. J. (2001). Social anxiety and response to  
889 touch: Incongruence between self-evaluative and physiological reactions. *Biological*  
890 *Psychology*, 58(3), 181–202. [https://doi.org/10.1016/S0301-0511\(01\)00113-2](https://doi.org/10.1016/S0301-0511(01)00113-2)
- 891 Zubieta, J.-K., Dannals, R. F., & Frost, J. J. (1999). Gender and Age Influences on Human Brain  
892 Mu-Opioid Receptor Binding Measured by PET. *American Journal of Psychiatry*,  
893 156(6), 842–848. <https://doi.org/10.1176/ajp.156.6.842>
- 894
- 895

896

## Supplementary Material

897

### Enhanced negative response to stress following morphine administration

898

### increases wanting of social reward

899

C. Massaccesi, M. Willeit, B. B. Quednow, U. M. Nater, C. Lamm, D. Mueller, G. Silani

900

901

### 902 **Index**

903

#### 1. *Effects of COVID-19 pandemic*

904

##### a. Safety measures

905

##### b. Additional analyses to assess the effects of the COVID-19 pandemic and employed safety

906

##### measures on responses to social rewards

907

#### 2. *Drug effects on cognitive functions*

908

#### 3. *Drug side-effects*

909

#### 4. *Serum levels of morphine and its metabolites*

910

911 **1. Effects of COVID-19 pandemic**

912 Half of the sample was collected after the COVID-19 pandemic outbreak. The implemented safety  
913 measures, as well as the statistical analyses conducted to assess the possible effects of the pandemic  
914 on the study dependent variables are described below.

915 **a. Safety measures**

916 After the COVID-19 pandemic outbreak the following safety measures were implemented:

- 917 • All experimenters wore face masks. The evaluating panel of the TSST wore a special face  
918 mask with a clear plastic insert on the mouth region in order to allow the participant to see the  
919 “absence of facial feedback” (crucial for stress induction) during the stress paradigm.
- 920 • Participants were provided with clear mouth visors resting on the chin in order to minimize  
921 the contact with the face and avoid disturbances during facial electromyography (EMG).

922 In order to assess participants reaction towards these safety measures, they were asked to answer  
923 the following questions at the end of the experimental session:

- 924 1) “How well/comfortable did you feel during the study?” rated on a VAS ranging from 1 (not  
925 all) to 101 (very much).
- 926 2) “How high do you rate the risk of infection during the study?” rated on a VAS ranging from  
927 1 (very high) to 101 (very low).
- 928 3) “Were you afraid of being infected with COVID-19 during the study?”, Yes/No
- 929 4) “How comfortable did you feel with the research team wearing a mask during the study?”  
930 rated on a VAS ranging from 1 (not all) to 101 (very much).

931 As shown in Figure S1, participants did not report to feel threatened by COVID-19 infection during  
932 the study, and to feel comfortable during the session.

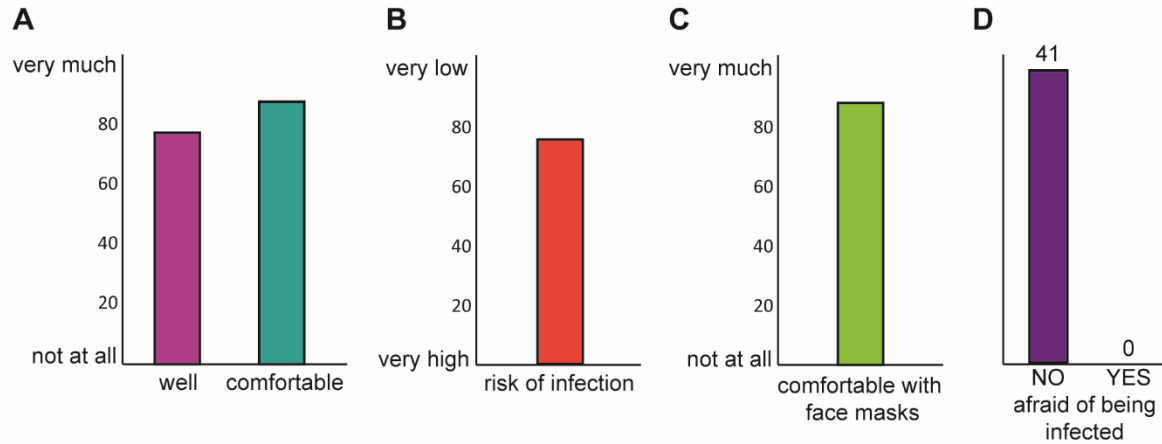

933  
 934 *Figure S1.* Participants’ attitudes toward COVID-19 pandemic and safety measures during the  
 935 study. (A) Ratings of wellness and comfort. (B) Perceived risk of COVID-19 infection during the  
 936 study. (C) Ratings of comfort related to use of face masks during the study. (D) Perceived fear of  
 937 having been infected with COVID-19 during the study.

938 **b. Additional analyses to assess the effects of the COVID-19 pandemic and employed**  
 939 **safety measures on responses to social rewards**

940 In order to rule out possible effects of the pandemic and related implemented safety measures on  
 941 subjective stress response (positive and negative mood, POMS subscales), as well as on the ratings  
 942 of wanting and liking, on the force exerted to obtain the social rewards, and on facial EMG data,  
 943 by adding the covariate “COVID-19” (2 levels: pre-covid19, covid19) to the analyses. No changes  
 944 in the pattern of results were observed.

945 **2. Drug effects on cognitive functions**

946 *Table S1.* Mean (SD) scores at the Trial Making Test (TMT) part A and part B, and at the Digit  
 947 Symbol Substitution Test (DSST) across drug groups.

|       | MORPHINE      | PLACEBO       | <i>p</i> value |
|-------|---------------|---------------|----------------|
| TMT A | 26.33 (8.02)  | 26.40 (8.60)  | 0.97           |
| TMT B | 57.25 (33.05) | 58.93 (21.94) | 0.79           |
| DSST  | 54.20 (8.99)  | 54.10 (9.32)  | 0.96           |

948 **3. Drug side-effects**

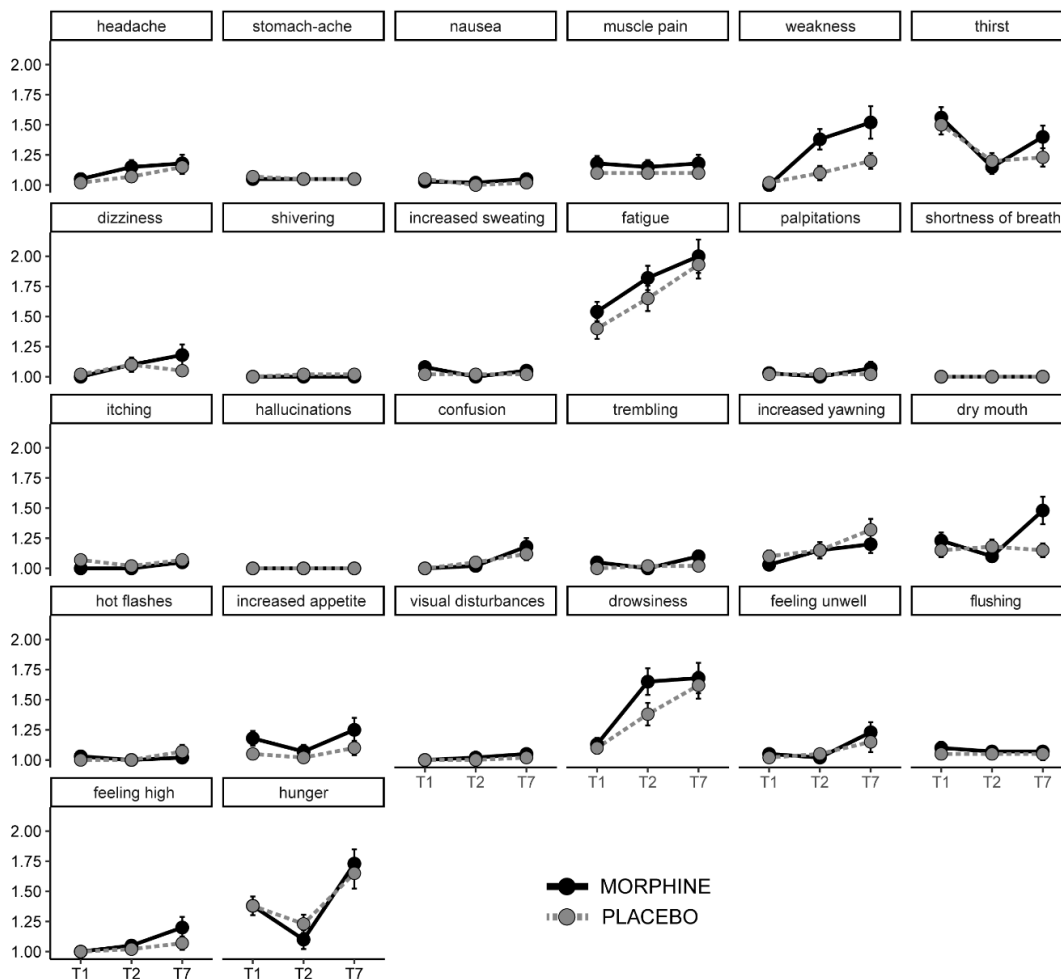

949  
 950 *Figure S2.* Drug side-effects assessed at baseline (T1), 60 min (T2) and 160 min (T7) after drug  
 951 administration using a 4-point Likert scale (with the anchors 1 = “not at all” and 4 = “very much”).

952 **4. Serum levels of morphine and its metabolites**

953 A blood sample was drawn at the end of the session (~180 min after drug administration). Analyses  
 954 were performed at the Institute of Clinical Chemistry, University Hospital Zurich, using liquid  
 955 chromatography coupled to mass spectrometry (LC-MS) to identify serum levels of morphine and  
 956 its two major metabolites: morphine-3-glucuronide (M3G) and morphine-6-glucuronide (M6G).  
 957 Blood samples from 3 participants could not be obtained and 10 samples were lost because of

958 storage problems. Results from the available samples confirmed drug uptake, as shown in *Table*  
959 *S2*.

960 *Table S2*. Serum levels (nmol/l) of morphine and its major metabolites at the end of the  
961 experimental session (~180 min after drug administration). M3G & M6G = morphine-3/6-  
962 glucuronide.

|          | <b>M</b> | <b>SD</b> |
|----------|----------|-----------|
| Morphine | 12.63    | 6.82      |
| M3G      | 394.79   | 179.46    |
| M6G      | 84.63    | 44.32     |

963
